# Supplementary material for: Construction of a Ce3+doped CeO2/Bi2MoO6heterojunction with a mutual component activation system for highly enhancing the visible-light photocatalytic activity for removal of TC or Cr(vi)
Source: Royal Society of Chemistry journal article supplement (doi:10.1039/c9qi00302a), 2019-01-01
Supplement: c9qi00302a1.pdf [file c9qi00302a1.pdf]

## Electronic Supplementary Information

### **Construction of Ce<sup>3+</sup> doped CeO<sub>2</sub>/Bi<sub>2</sub>MoO<sub>6</sub> heterojunction with a mutual component activation system for highly enhancing visible-light photocatalytic activity for removal of TC or Cr (VI)**

Gui Yang <sup>a</sup>, Yujun Liang <sup>a,\*</sup>, Kai Li <sup>a</sup>, Jian Yang <sup>a</sup>, Rui Xu <sup>b</sup>, Xianjun Xie <sup>b,\*</sup>

<sup>a</sup> *Engineering Research Center of Nano-Geomaterials of Ministry of Education, Faculty of Materials Science and Chemistry, China University of Geosciences, Wuhan 430074, China*

<sup>b</sup> *State Key Laboratory of Biogeology and Environmental Geology & School of Environmental Studies, China University of Geosciences, Wuhan 430074, China.*

\*Corresponding author: Tel.: +86 27 67884814; fax: +86 27 67883733.

E-mail address: [yujunliang@sohu.com](mailto:yujunliang@sohu.com) (Yujun Liang); [xjxie@cug.edu.cn](mailto:xjxie@cug.edu.cn) (Xianjun Xie)

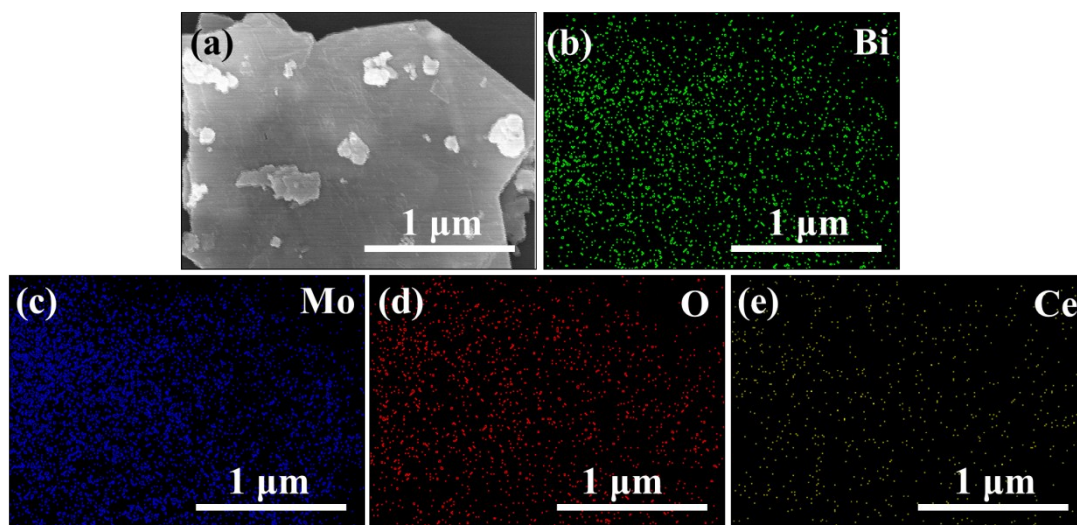

Fig. S1 EDS elemental mapping images of 20% C-BMO sample prepared by molten salt method.

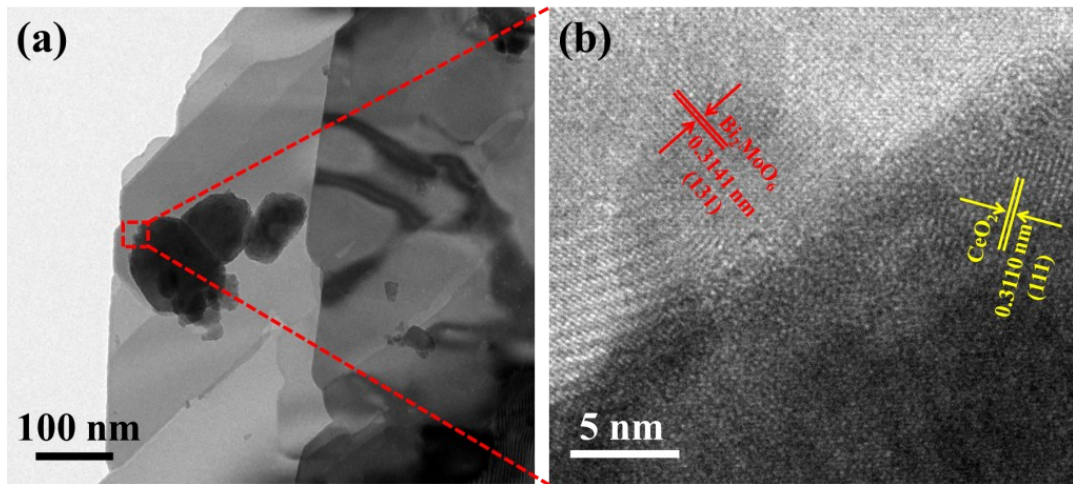

Fig. S2 (a) TEM image C-BMO heterojunction, (b) HRTEM image of C-BMO heterojunction.

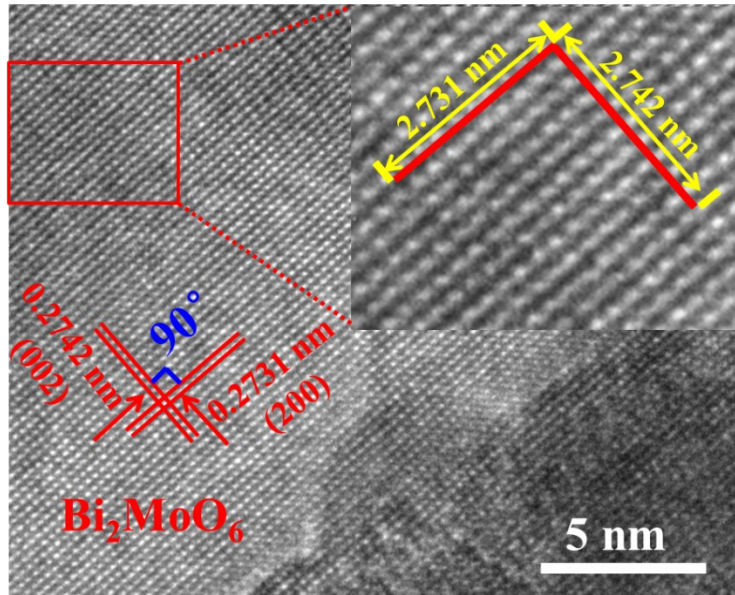

Fig. S3 HRTEM image of C-BMO heterojunction considering only the  $\text{Bi}_2\text{MoO}_6$ .

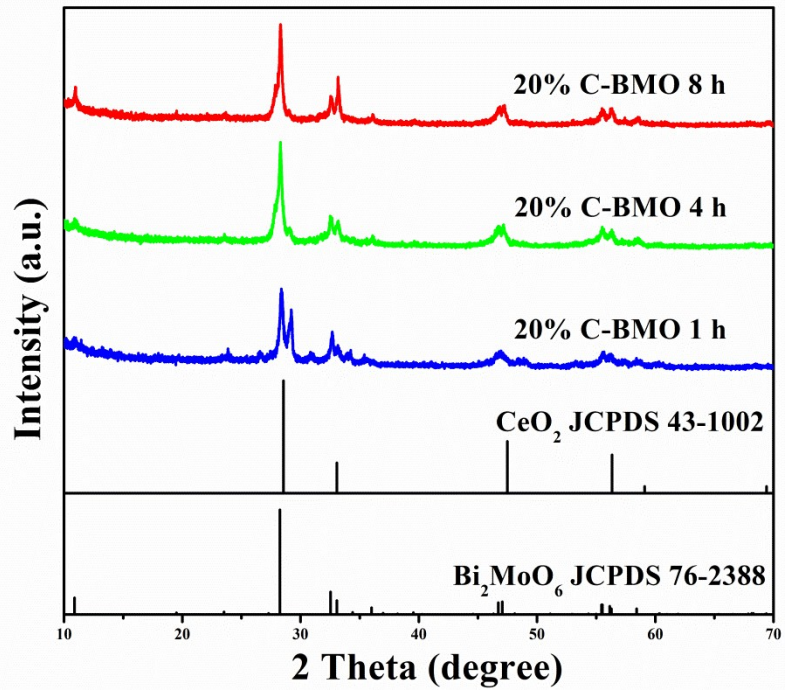

Fig. S4 XRD patterns of 20% C-BMO at different calcination times.

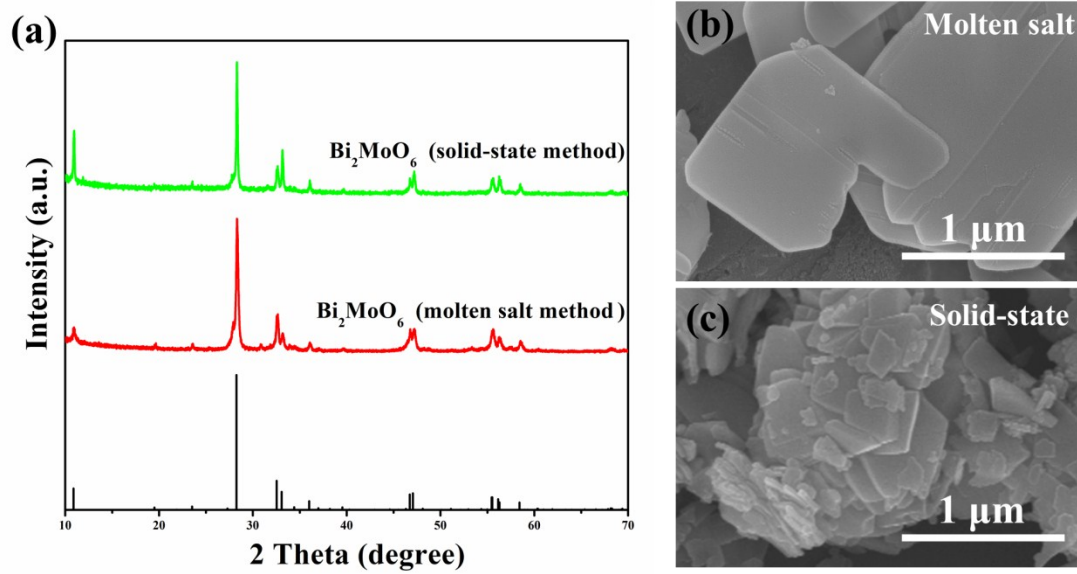

Fig. S5 The XRD and SEM of  $\text{Bi}_2\text{MoO}_6$  synthesized by molten salt method and solid-state reaction.

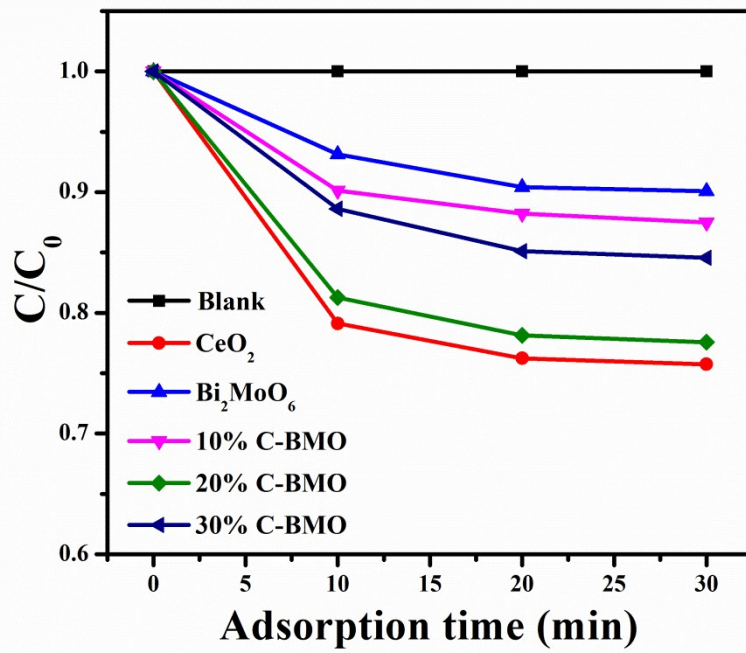

Fig. S6 The adsorption performance of as-prepared samples for the removal of TC in the dark.

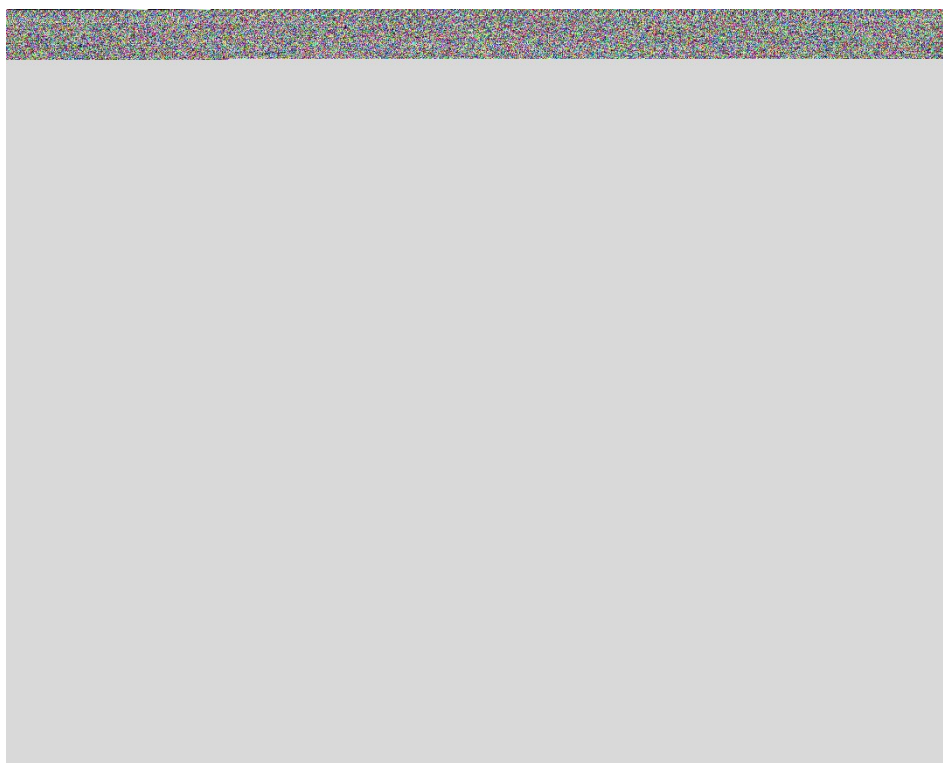

Fig. S7 The adsorption performance of as-prepared samples for the removal of Cr (VI)  
in the dark.



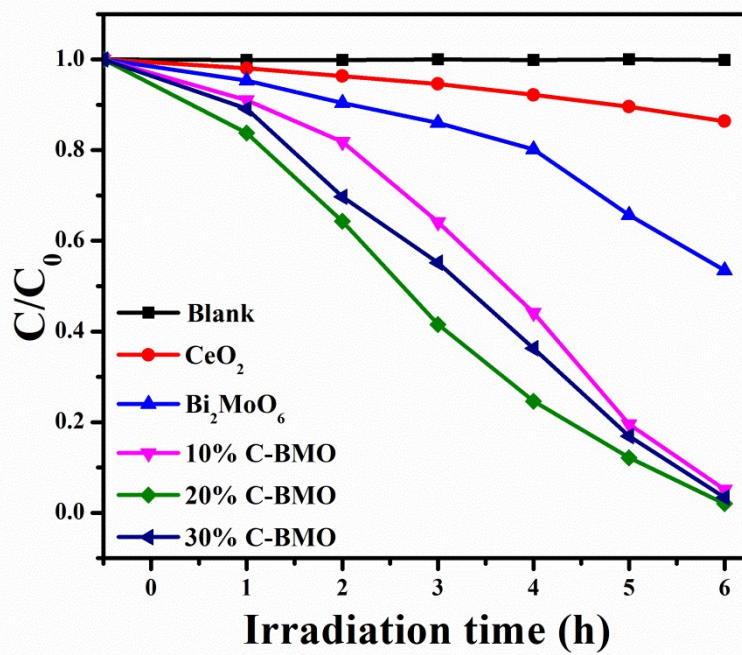

Fig. S8 Photodegradations of RhB over as-prepared products under visible irradiation.

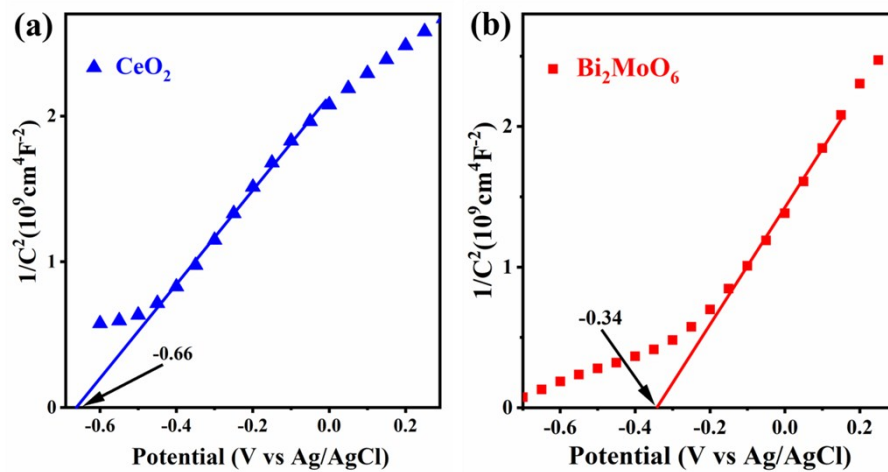

Fig. S9 Mott-Schottky plots of (a)  $\text{CeO}_2$  and (a)  $\text{Bi}_2\text{MoO}_6$ .
